# Supplementary material for: Reconstruction of Long-Chain Polyunsaturated Acid Synthesis Pathways in Marine Red Microalga Porphyridium cruentum Using Lipidomics and Transcriptomics
Source: MDPI journal article supplement (doi:10.3390/md22020082), 2024-02-09
Supplement: s1 [file s1]

## Supplementary Data

**MANUSCRIPT TITLE:** Reconstruction of long-chain polyunsaturated acids synthesis pathways in marine microalga *Porphyridium cruentum* using lipidomics and transcriptomics

**AUTHORS:** Tao Li <sup>1</sup>, Chulin Li <sup>1</sup>, Weinan Wang <sup>1</sup>, Hualian Wu <sup>1</sup>, Houbo Wu <sup>1</sup>, Jin Xu <sup>2\*</sup> and Wenzhou Xiang <sup>1\*</sup>

**ADDRESS:** 1. CAS Key Laboratory of Tropical Marine Bio-resources and Ecology, Guangdong Key Laboratory of Marine Materia Medica, Institution of South China Sea Ecology and Environmental Engineering, South China Sea Institute of Oceanology, Chinese Academy of Sciences, Guangzhou 510301, China

2. Guangzhou Institute of Energy Conversion, Chinese Academy of Sciences, CAS Key Laboratory of Renewable Energy, Guangdong Provincial Key Laboratory of New and Renewable Energy Research and Development, Guangzhou 510640, China

**NO. OF TABLES:** 2

**NO. OF FIGURES:** 1

**NO. OF PAGES:** 4

**Table S1.** Summary of output statistics by Illumina sequencing

| Sample       | Raw reads | Clean reads | Error rate(%) | Q30(%) | GC content | Total reads | Total mapped | Total mapped(%) |
|--------------|-----------|-------------|---------------|--------|------------|-------------|--------------|-----------------|
| N-limitation | 49327784  | 48762135    | 0.026         | 93.35  | 58.58      | 48762135    | 44972016     | 92.20           |
| N-repletion  | 47751462  | 47199666    | 0.026         | 93.52  | 57.77      | 47199666    | 44103622     | 93.44           |

**Table S2** The annotation statistics of unigenes in *Porphyridium cruentum* CCALA 415

|          | GO   | KEGG | COG  | NR   | Swiss-Prot | Pfam | Total |
|----------|------|------|------|------|------------|------|-------|
| Unigenes | 6364 | 3879 | 6136 | 6989 | 5439       | 7082 | 9898  |

\*NR: Non-redundant protein sequence database; NT: Nucleotide Sequence Database; KEGG: Kyoto Encyclopedia of Genes and Genomes; COG: clusters of orthologous groups; GO: Gene ontology

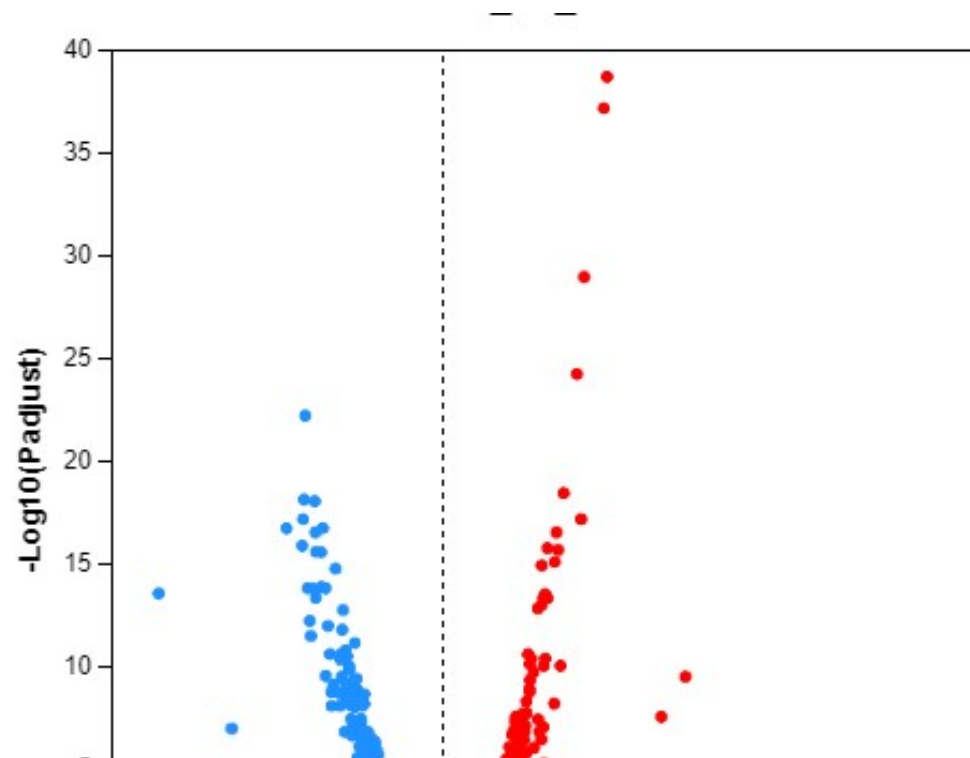

**Figure S1.** Statistics of differentially expressed genes in *Porphyridium cruentum* CCALA 415 under N-limited and N-replete conditions
